# Supplementary material for: Theoretical and Experimental Studies on Inclusion Complexes of Pinostrobin and β-Cyclodextrins
Source: PubMed Central journal article supplement (PMC5874535; doi:10.3390/scipharm86010005), 2018-01-30
Supplement: scipharm-86-00005-s001.pdf [file scipharm-86-00005-s001.pdf]

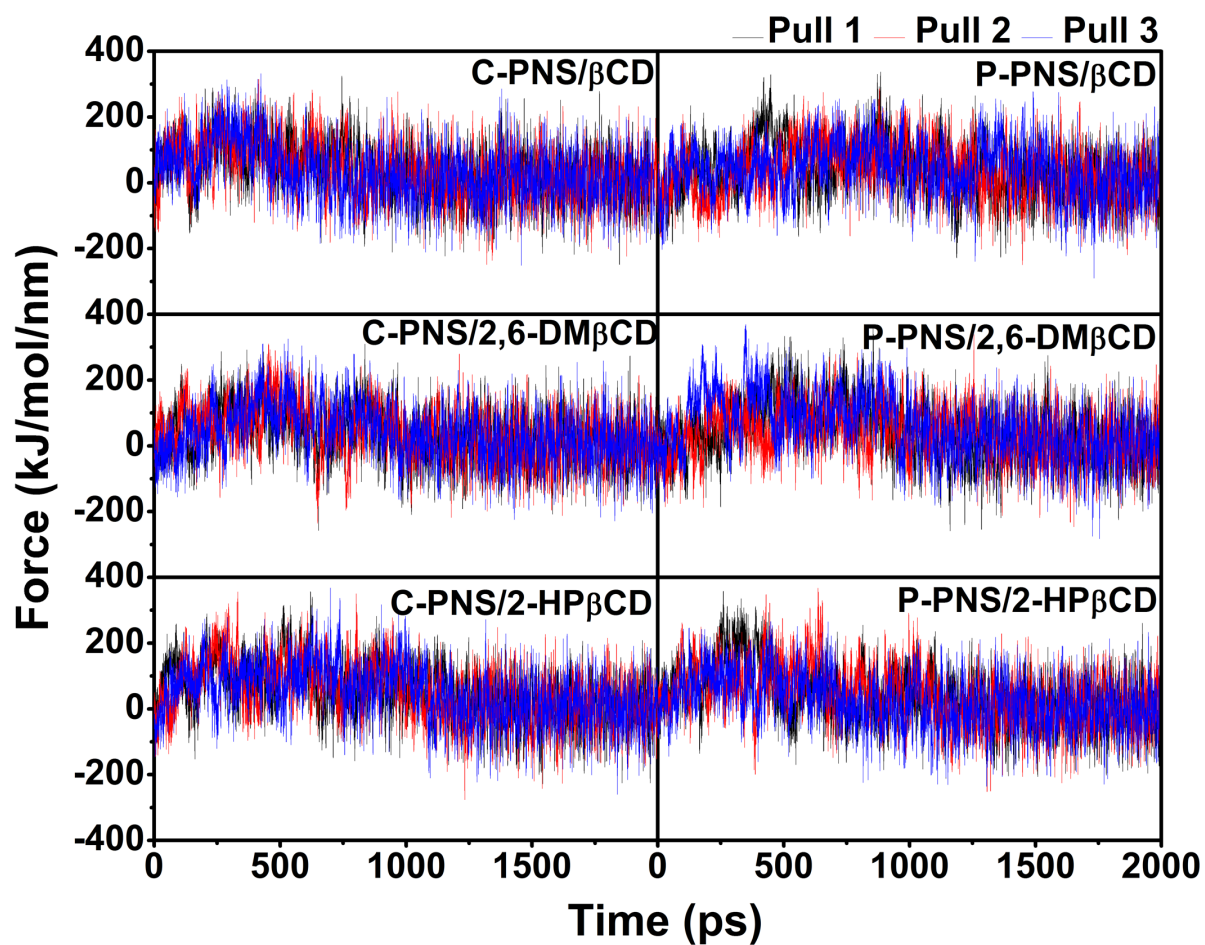

Fig. S1 The force-time profile of the ligand being pulled out from the wider rim along the host cavity axis for each inclusion complex
